# Supplementary material for: Histone H3 Lysine 4 and 27 Trimethylation Landscape of Human Alzheimer’s Disease
Source: MDPI journal article supplement (doi:10.3390/cells11040734), 2022-02-19
Supplement: s1 [file s1]

## Supplementary materials

**Table S1. Tissue donor information.** Group, Age, sex, Braak stage, MMSE score and post-mortem delay (PMD) are reported for each of tissues donor used in the present study.

| NPID      | Age | Sex    | Braak | Last MMSE     | PMDelay |
|-----------|-----|--------|-------|---------------|---------|
| Control   |     |        |       |               |         |
| NP 12/161 | 69  | male   | 1     | Not available | 48      |
| NP13/081  | 70  | male   | 1     | Not available | 48      |
| RI110/04  | 86  | male   | 1     | Not available | 96      |
| RI 04/158 | 83  | male   | 0     | Not available | 24      |
| RI 03/211 | 85  | male   | 0     | Not available | 24      |
| NP 12/132 | 67  | female | 1     | Not available | 48      |
| NP 13/074 | 70  | female | 1     | Not available | 24      |
| RI 04/079 | 84  | female | 1     | Not available | 24      |
| RI 03/205 | 84  | female | 1     | Not available | 48      |
| Severe    |     |        |       |               |         |
| NP 14/115 | 75  | male   | 5     | 0/30          | 46      |
| NP 14/151 | 72  | male   | 6     | 0/30          | 54      |
| NP 14/109 | 78  | male   | 6     | 0/30          | 34      |
| NP 14/050 | 82  | female | 6     | 0/30          | 18      |
| NP 14/033 | 77  | female | 5     | 0/30          | 31.25   |
| NP128/14  | 61  | female | 6     | Not available | 23      |

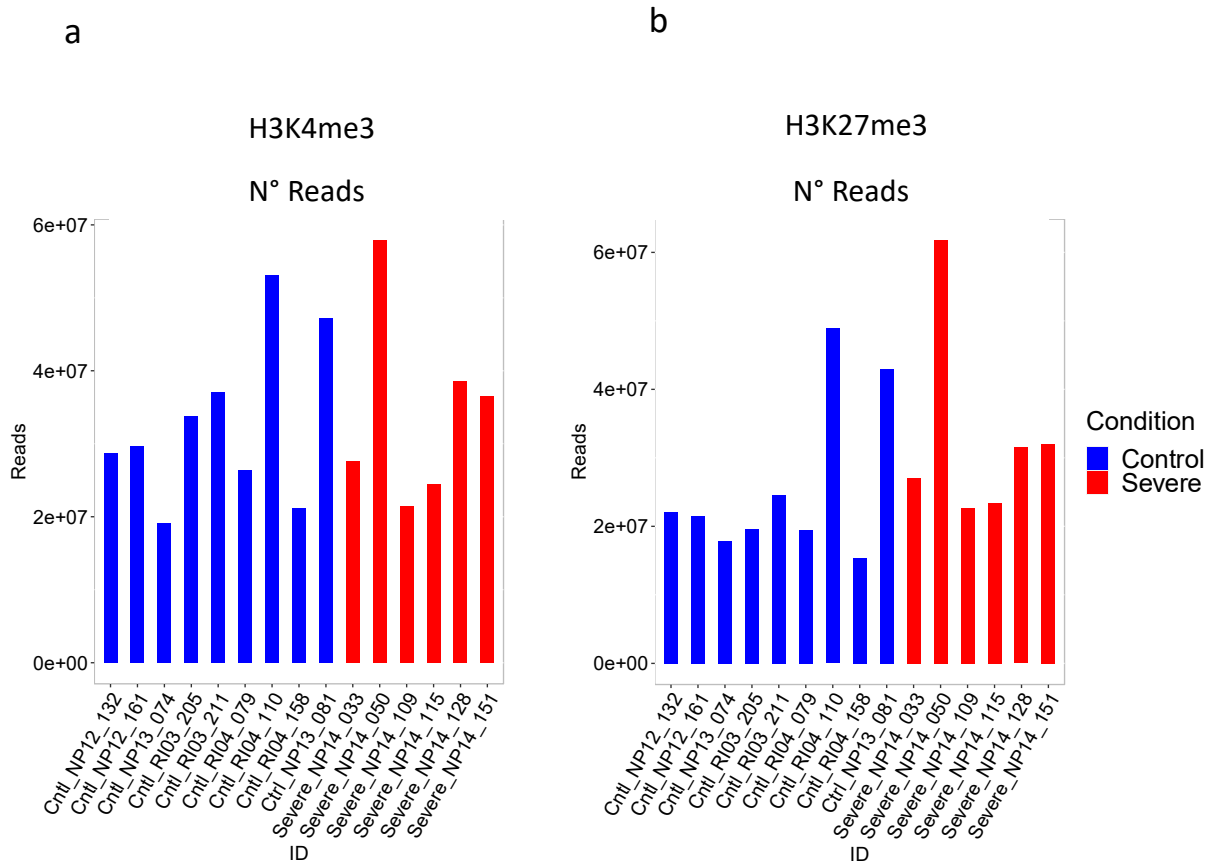

**Figure S1.** Number uniquely mapped and properly paired reads. Number of reads for H3K4me3 (a) and H3K27me3 (b). Control samples are in blue, severe AD in red.

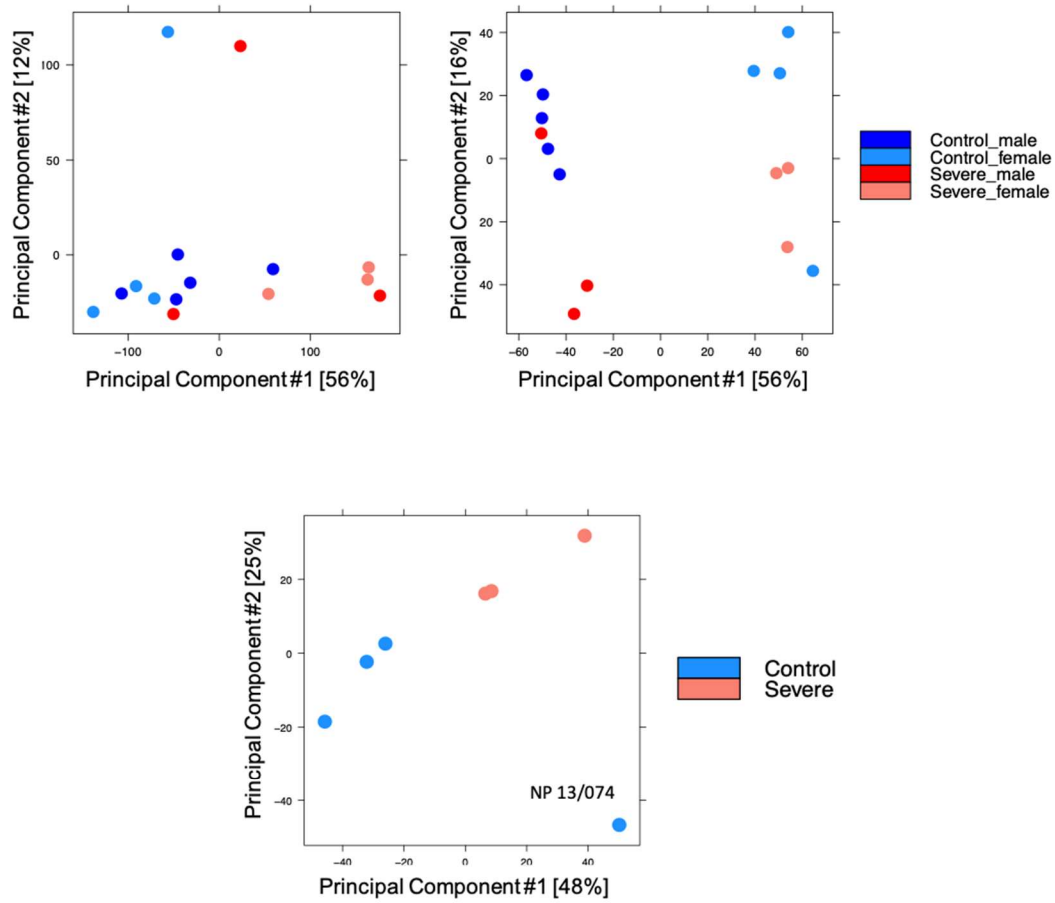

**Figure S2: Principal Component Analysis.**

- (a) PCA using TMM normalized count of H3K4me3 dataset across 54,800 genomic regions. (Control male in blue, Control female in light blue, Severe AD male in red, Severe AD female in pink)
- (b) PCA using TMM normalized count of H3K27me3 dataset across 36,669 genomic regions. (Control male in blue, Control female in light blue, Severe AD male in red, Severe AD female in pink)
- (c) PCA relative to female H3K27me3 dataset. Control samples are in light blue, severe AD in pink.
